# Supplementary material for: Renal Glucose Release after Unilateral Renal Denervation during a Hypoglycemic Clamp in Pigs with an Altered Hypothalamic Pituitary Adrenal Axis after Late-Gestational Dexamethasone Injection
Source: MDPI journal article supplement (doi:10.3390/ijms241612738), 2023-08-13
Supplement: s1 [file s1]

Table S1. Original data of SGN after unilateral ablation of renal nerves.

| Number of animal                                       |        |        |        |        |        |        |        |        |        |        |
|--------------------------------------------------------|--------|--------|--------|--------|--------|--------|--------|--------|--------|--------|
|                                                        | 1      | 2      | 3      | 4      | 5      | 6      | 7      | 8      | 9      | 10     |
| Body site of ablation                                  |        |        |        |        |        |        |        |        |        |        |
|                                                        | right  | right  | left   | left   | right  | right  | left   | right  | left   | left   |
| SGN of ablated kidney at duration of hypoglycaemia     |        |        |        |        |        |        |        |        |        |        |
| 45'                                                    | 0.0032 | 0.0012 | 0.0010 | 0.0002 | 0.0095 | 0.0097 | 0.5727 | 0.0894 | 0.4902 | 0.0032 |
| 60'                                                    | 0.0115 | 0.0058 | 0.0055 | 0.0003 | 0.0013 | 0.0682 | 0.1540 | 0.0494 | 0.0279 | 0.0115 |
| 75'                                                    | 0.0174 | 0.0056 | 0.0035 | 0.0019 | 0.1241 | 0.9722 | 1.0431 | 0.0224 | 0.1464 | 0.0174 |
| 90'                                                    | 0.0062 | 0.0002 | 0.0055 | 0.0002 | 0.0754 | 0.1652 | 0.2110 | 0.0196 | 0.1726 | 0.0062 |
| 105'                                                   | 0.0156 | 0.0005 | 0.0109 | 0.0031 | 0.0075 | 0.0236 | 0.0745 | 0.0505 | 0.0745 | 0.0156 |
| SGN of non-ablated kidney at duration of hypoglycaemia |        |        |        |        |        |        |        |        |        |        |
| 45'                                                    | 0.0190 | 0.0208 | 0.0149 | 0.0004 | 0.1001 | 0.0116 | 1.3297 | 0.1096 | 0.2482 | 0.0190 |
| 60'                                                    | 0.0130 | 0.0062 | 0.0872 | 0.0011 | 0.0641 | 0.0968 | 0.1670 | 0.1613 | 0.5763 | 0.0130 |
| 75'                                                    | 0.0231 | 0.0294 | 0.0154 | 0.0063 | 0.1590 | 0.9779 | 0.2437 | 0.0224 | 0.0314 | 0.0231 |
| 90'                                                    | 0.0092 | 0.0027 | 0.0693 | 0.0012 | 0.2158 | 0.1629 | 0.2877 | 0.0126 | 0.1962 | 0.0092 |
| 105'                                                   | 0.0044 | 0.0140 | 0.0535 | 0.0091 | 0.3181 | 0.0437 | 0.1734 | 0.0316 | 0.1948 | 0.0044 |
